# Supplementary material for: Significant Clinical Factors Associated with Long-term Mortality in Critical Cancer Patients Requiring Prolonged Mechanical Ventilation
Source: PubMed Central journal article supplement (PMC5438375; doi:10.1038/s41598-017-02418-4), 2017-05-19
Supplement: 41598_2017_2418_MOESM1_ESM.pdf [file 41598_2017_2418_MOESM1_ESM.pdf]

# Significant Clinical Factors Associated with Long-term Mortality in Critical Cancer Patients Requiring Prolonged Mechanical Ventilation

Li-Ta Keng<sup>1</sup>, Kuei-Pin Chung<sup>2,3</sup>, Shu-Yung Lin<sup>4</sup>, Sheng-Kai Liang<sup>1</sup>, Jui-Chen Cheng<sup>5</sup>, I-Chun Chen<sup>6,7</sup>, Yen-Fu Chen<sup>8</sup>, Hou-Tai Chang<sup>9</sup>, Chia-Lin Hsu<sup>4\*</sup>, Jih-Shuin Jerng<sup>4</sup>, Hao-Chien Wang<sup>4</sup>, Ping-Hung Kuo<sup>4</sup>, Huey-Dong Wu<sup>4</sup>, Jin-Yuan Shih<sup>4</sup> & Chong-Jen Yu<sup>4</sup>

<sup>1</sup>Department of Internal Medicine, National Taiwan University Hospital Hsin-Chu Branch, Hsin-Chu, Taiwan.

Department of <sup>2</sup>Laboratory Medicine, <sup>4</sup>Internal Medicine, <sup>5</sup>Integrated Diagnostics and Therapeutics, and <sup>6</sup>Oncology, National Taiwan University Hospital, Taipei, Taiwan.

Department of <sup>3</sup>Laboratory Medicine and <sup>7</sup>Oncology, National Taiwan University Cancer Center, Taipei, Taiwan.

<sup>8</sup>Department of Internal Medicine, National Taiwan University Hospital Yun-Lin Branch, Yun-Lin, Taiwan.

<sup>9</sup>Department of Internal Medicine and Department of Critical Care Medicine, Far Eastern Memorial Hospital, New Taipei, Taiwan.

**Supplementary Table S1.** Multivariate logistic regression models for significant clinical characteristics associated with hospital mortality in all patients with prolonged mechanical ventilation\*

| Parameters                        | $\beta$ | SE    | Odds ratio (95% CI) | <i>P</i> |
|-----------------------------------|---------|-------|---------------------|----------|
| Hemato-oncologic diagnoses        |         |       |                     |          |
| Non-cancer                        |         |       | 1                   | –        |
| Hematologic cancer                | 1.147   | 0.456 | 3.148 (1.288–7.693) | .012     |
| Non-hematologic cancer            | 1.014   | 0.298 | 2.756 (1.536–4.946) | .001     |
| At the time of ICU admission      |         |       |                     |          |
| ARDS                              | 0.097   | 0.365 | 2.711 (1.325–5.549) | .006     |
| At the time of RCC transfer       |         |       |                     |          |
| SOFA                              | 0.139   | 0.056 | 1.149 (1.029–1.182) | .014     |
| Leukocytes ( $10^3/\mu\text{L}$ ) | 0.057   | 0.021 | 1.058 (1.015–1.104) | .008     |
| Hemoglobin (g/dL)                 | –0.346  | 0.134 | 0.708 (0.544–0.920) | .010     |
| Bilirubin (mg/dL)                 | 0.169   | 0.080 | 1.184 (1.013–1.384) | .034     |

ARDS, acute respiratory distress syndrome; CI, confidence interval; ICU, intensive care unit; RCC, respiratory care center; SE, standard error; SOFA, Sequential Organ Failure Assessment score.

\*Variables with statistical significance ( $P < .05$ ) in the univariate analyses were included in the multivariate logistic regression models. Backward variable selection was performed, and the criteria of *P* values for entry and stay were set at .05 and .10, respectively.

**Supplementary Table S2.** Hemato-oncologic diagnoses of the study population

|                                        | Entire population |        | RCC outcome     |        |                 |        | <i>P</i> |
|----------------------------------------|-------------------|--------|-----------------|--------|-----------------|--------|----------|
|                                        |                   |        | Weaning success |        | Weaning failure |        |          |
| <b>N</b>                               | 112               |        | 50              |        | 62              |        |          |
| <b>Non-hematologic cancer</b>          | 89                | (79.5) | 40              | (80.0) | 49              | (79.0) | .900     |
| Cancer origin*                         |                   |        |                 |        |                 |        |          |
| Lung                                   | 24                | (27.0) | 7               | (17.5) | 17              | (34.7) | .069     |
| Head and neck                          | 20                | (22.5) | 10              | (25.0) | 10              | (20.4) | .606     |
| Genitourinary tract                    | 20                | (22.5) | 11              | (27.5) | 9               | (18.4) | .305     |
| Gastrointestinal tract                 | 14                | (15.7) | 6               | (15.0) | 8               | (16.3) | .864     |
| Other                                  | 20                | (22.5) | 11              | (27.5) | 9               | (18.4) | .305     |
| Disease status*                        |                   |        |                 |        |                 |        | .117     |
| Controlled <sup>†</sup>                | 52                | (58.4) | 27              | (67.5) | 25              | (51.0) |          |
| Uncontrolled <sup>†</sup>              | 37                | (41.6) | 13              | (32.5) | 24              | (49.0) |          |
| <b>Hematologic malignancy</b>          | 28                | (25.0) | 14              | (28.0) | 14              | (22.6) | .510     |
| Cancer histology <sup>‡</sup>          |                   |        |                 |        |                 |        | .058     |
| Leukemia                               | 15                | (53.6) | 5               | (35.7) | 10              | (71.4) |          |
| Lymphoma or multiple myeloma           | 13                | (46.4) | 9               | (64.3) | 4               | (28.6) |          |
| Disease status <sup>‡</sup>            |                   |        |                 |        |                 |        | > .999   |
| Controlled <sup>†</sup>                | 5                 | (17.9) | 2               | (14.3) | 3               | (21.4) |          |
| Uncontrolled <sup>†</sup>              | 23                | (82.1) | 12              | (85.7) | 11              | (78.6) |          |
| <b>Double malignancies<sup>§</sup></b> | 14                | (12.5) | 8               | (16.0) | 6               | (9.7)  | .315     |

Data are presented as number (%). RCC, respiratory care center.

\*Number (%) among patients with non-hematologic malignancy (n=89).

<sup>†</sup>Disease conditions classified as cure, complete remission, partial remission, or stable disease were considered controlled, while those classified as progressive or newly-diagnosed diseases were considered uncontrolled. In patients with non-hematologic malignancies from two different origins,

the disease status was defined as uncontrolled if either one was uncontrolled.

‡ Number (%) among patients with hematologic malignancy (n=28).

§ Nine patients with solid cancers from two different origins, 4 patients with both solid cancer and hematologic malignancy, and 1 patient with hematologic malignancy and solid cancers from two different origins (triple malignancies).

**Supplementary Table S3.** Clinical characteristics at baseline and during intensive care unit hospitalization

|                                     | Entire population |        | RCC outcome     |        |                 |        | <i>P</i> |
|-------------------------------------|-------------------|--------|-----------------|--------|-----------------|--------|----------|
|                                     |                   |        | Weaning success |        | Weaning failure |        |          |
| <b>N</b>                            | 112               |        | 50              |        | 62              |        |          |
| <b>Age (years)</b>                  | 69.0±14.7         |        | 69.1±12.6       |        | 69.0±16.3       |        | .988     |
| <b>Sex</b>                          |                   |        |                 |        |                 |        |          |
| Male                                | 65                | (58.0) | 33              | (66.0) | 32              | (51.6) | .125     |
| Female                              | 47                | (42.0) | 17              | (34.0) | 30              | (48.4) |          |
| <b>Cancer status*</b>               |                   |        |                 |        |                 |        | .289     |
| Controlled non-hematologic cancer   | 52                | (46.4) | 27              | (54.0) | 25              | (40.3) |          |
| Uncontrolled non-hematologic cancer | 37                | (33.0) | 13              | (26.0) | 24              | (38.7) |          |
| Without non-hematologic cancer      | 23                | (20.5) | 10              | (20.0) | 13              | (21.0) |          |
| <b>Co-morbidities</b>               |                   |        |                 |        |                 |        |          |
| Congestive heart failure            | 13                | (11.6) | 7               | (14.0) | 6               | (9.7)  | .478     |
| Diabetes mellitus                   | 35                | (31.3) | 11              | (22.0) | 24              | (38.7) | .058     |
| Chronic lung disease                | 19                | (17.0) | 7               | (14.0) | 12              | (19.4) | .453     |
| Cirrhosis                           | 6                 | (5.4)  | 5               | (10.0) | 1               | (1.6)  | .087     |
| Neurologic disease                  | 23                | (20.5) | 11              | (22.0) | 12              | (19.4) | .730     |
| Chronic kidney disease              | 18                | (16.1) | 9               | (18.0) | 9               | (14.5) | .618     |
| <b>ICU admission</b>                |                   |        |                 |        |                 |        |          |
| APACHE II                           | 27.0±7.9          |        | 28.1±7.6        |        | 26.0±8.1        |        | .168     |
| SOFA                                | 7.5±3.5           |        | 7.8±3.6         |        | 7.2±3.4         |        | .317     |
| Severe sepsis/septic shock          | 57                | (50.9) | 24              | (48.0) | 33              | (53.2) | .582     |
| Pneumonia                           | 79                | (83.2) | 35              | (83.3) | 44              | (83.0) | .968     |
| ARDS                                | 22                | (19.6) | 8               | (16.0) | 14              | (22.6) | .384     |
| Acute kidney injury <sup>†</sup>    | 30                | (28.6) | 17              | (36.2) | 13              | (22.4) | .121     |

**ICU stay**

|                                         |           |        |           |        |           |        |      |
|-----------------------------------------|-----------|--------|-----------|--------|-----------|--------|------|
| Infection <sup>‡</sup>                  | 60        | (53.6) | 30        | (60.0) | 30        | (48.4) | .221 |
| Severe sepsis/septic shock <sup>‡</sup> | 21        | (18.8) | 10        | (20.0) | 11        | (17.7) | .761 |
| Length of stay (days)                   | 27.7±14.2 |        | 27.1±15.2 |        | 28.2±13.3 |        | .700 |

---

Data are presented as the mean±standard deviation or number (%). APACHE II, Acute Physiology and Chronic Health Evaluation score; ARDS, acute respiratory distress syndrome; ICU, intensive care unit; RCC, respiratory care center; SOFA, Sequential Organ Failure Assessment score.

\*Disease conditions classified as cure, complete remission, partial remission, or stable disease were considered under control, while those classified as progressive or newly-diagnosed diseases were considered uncontrolled. In patients with non-hematologic malignancies from two different origins, the disease status was defined as uncontrolled if either one was uncontrolled.

<sup>†</sup> In patients without end-stage renal disease before admission.

<sup>‡</sup> Hospital-acquired infection and hospital-acquired severe sepsis/septic shock.

**Supplementary Table S4.** Clinical characteristics during respiratory care center hospitalization

|                                             | Entire population |        | RCC outcome     |                 | <i>P</i>    |        |      |
|---------------------------------------------|-------------------|--------|-----------------|-----------------|-------------|--------|------|
|                                             |                   |        | Weaning success | Weaning failure |             |        |      |
| <b>N</b>                                    | 112               |        | 50              |                 | 62          |        |      |
| <b>RCC transfer</b>                         |                   |        |                 |                 |             |        |      |
| Tracheostomy                                | 70                | (62.5) | 31              | (62.0)          | 39          | (62.9) | .922 |
| Active infection*                           | 24                | (21.4) | 6               | (12.0)          | 18          | (29.0) | .029 |
| APACHE II                                   | 16.2±5.7          |        | 15.8±5.0        |                 | 16.5±6.2    |        | .475 |
| SOFA                                        | 5.1±2.8           |        | 4.5±2.5         |                 | 5.7±2.9     |        | .030 |
| <b>Laboratory examinations</b>              |                   |        |                 |                 |             |        |      |
| Leukocytes (10 <sup>3</sup> /μL)            | 10.5±8.2          |        | 9.4±5.0         |                 | 11.3±10.1   |        | .219 |
| Platelets (10 <sup>3</sup> /μL)             | 189.7±139.0       |        | 214.2±145.9     |                 | 170.0±131.0 |        | .094 |
| Hemoglobin (g/dL)                           | 9.4±1.2           |        | 9.6±1.2         |                 | 9.1±1.1     |        | .032 |
| Creatinine (mg/dL)                          | 1.4±1.4           |        | 1.5±1.4         |                 | 1.3±1.4     |        | .475 |
| pH                                          | 7.4±0.1           |        | 7.4±0.1         |                 | 7.4±0.1     |        | .671 |
| PaCO <sub>2</sub> (mm Hg)                   | 40.3±9.4          |        | 39.4±7.9        |                 | 41.1±10.4   |        | .318 |
| PaO <sub>2</sub> /FiO <sub>2</sub> (mm Hg)  | 290.7±121.9       |        | 317.4±127.1     |                 | 269.1±114.0 |        | .037 |
| HCO <sub>3</sub> <sup>-</sup> (mmol/L)      | 27.2±5.8          |        | 27.3±4.7        |                 | 27.2±6.5    |        | .929 |
| <b>Weaning parameter</b>                    |                   |        |                 |                 |             |        |      |
| P <sub>Imax</sub> ≥ -20 cm H <sub>2</sub> O | 20                | (17.9) | 4               | (8.0)           | 16          | (25.8) | .014 |
| P <sub>Emax</sub> ≤ +30 cm H <sub>2</sub> O | 53                | (47.3) | 20              | (40.0)          | 33          | (53.2) | .163 |
| RSBI ≥ 105                                  | 50                | (44.6) | 18              | (36.0)          | 32          | (51.6) | .098 |
| Tidal volume ≤ 5 mL/kg                      | 49                | (43.8) | 19              | (38.0)          | 30          | (48.4) | .271 |
| Minute ventilation ≥ 10 L/min               | 31                | (27.7) | 12              | (24.0)          | 19          | (30.6) | .435 |
| <b>RCC stay</b>                             |                   |        |                 |                 |             |        |      |
| Length of stay (days)                       | 20.0±11.5         |        | 19.0±10.0       |                 | 20.7±12.5   |        | .440 |

Data are presented as mean±standard deviation or number (%). APACHE II, Acute Physiology and Chronic Health Evaluation score; FiO<sub>2</sub>, fraction of inspiratory oxygen; PaCO<sub>2</sub>, arterial partial pressure of carbon dioxide; PaO<sub>2</sub>, arterial partial pressure of oxygen; P<sub>E<sub>max</sub></sub>, maximal expiratory pressure; P<sub>I<sub>max</sub></sub>, maximal inspiratory pressure; RCC, respiratory care center; RSBI, rapid shallow breath index; SOFA, Sequential Organ Failure Assessment score.

\*Presence of active infection within 72 hours before RCC transfer.
